# Supplementary material
Source: Research Square preprint supplement (doi:10.21203/rs.3.rs-9645340/v1)
Supplement: Supplementary file 2 [file c0e5cb3c57f956b201d531e9.docx]

# GRAPHICAL ABSTRACT
